*The European Journal of Public Health*, Vol. 27, No. 4, 729–736

© The Author 2017. Published by Oxford University Press on behalf of the European Public Health Association.

This is an Open Access article distributed under the terms of the Creative Commons Attribution License (<http://creativecommons.org/licenses/by/4.0/>), which permits unrestricted reuse, distribution, and reproduction in any medium, provided the original work is properly cited.

doi:10.1093/eurpub/ckw268 Advance Access published on 4 February 2017

## Restrictions on the use of e-cigarettes in public and private places—current practice and support among adults in Great Britain

Leonie S. Brose<sup>1</sup>, Ann McNeill<sup>1</sup>, Deborah Arnott<sup>2</sup>, Hazel Cheeseman<sup>2</sup>

<sup>1</sup> Department of Addictions, Institute of Psychiatry, Psychology and Neuroscience, King's College London, UK and UK Centre for Tobacco and Alcohol Studies (UKCTAS), London, UK

<sup>2</sup> Action on Smoking and Health, 67-68 Hatton Garden, London, EC1N 8JY UK

**Correspondence:** Leonie S. Brose, Department of Addictions, Institute of Psychiatry, Psychology and Neuroscience, King's College London, 4 Windsor Walk, London SE5 8BB, UK, Tel: +44 (0) 20 7848 0445, e-mail: leonie.brose@kcl.ac.uk

**Background:** Debates around policies regulating e-cigarette use make it important to obtain an overview of current practice, people's attitudes and correlates of policy support. Aims were to assess (i) current practices for e-cigarette use in homes and workplaces; (ii) characteristics associated with allowing e-cigarette use in the home; and (iii) level of, and characteristics associated with, support for extending smoke-free legislation to include e-cigarettes. **Methods:** Online survey in 2016,  $n = 11\,389$  adults in Great Britain. Descriptives for all measures; multivariable logistic regressions assessed correlates of allowing e-cigarette use and support for extension of legislation. **Results:** Most (79%) reporting on workplace policies reported some level of restrictions on e-cigarette use. Small majorities would not allow e-cigarette use in their home (58%) and supported an extension of smoke-free legislation (52%; 21% opposed). Allowing use was less likely and supporting an extension more likely among men, respondents from a higher socio-economic status, ex-smokers, never-smokers, non-users of e-cigarettes and respondents with increased perceived harm of e-cigarettes or nicotine (all  $P < 0.001$ ). Older respondents were less likely to allow use and to support an extension and Labour voters more likely to allow use. **Conclusions:** In Great Britain, the majority of workplaces has policies restricting e-cigarette use. Over half of adults would not allow use of e-cigarettes in their home and support prohibiting the use of e-cigarettes in smoke-free places. Adjusting for socio-demographics, more restrictive attitudes are more common among never-smokers, never-users and those with increased perception of relative harms of e-cigarettes or nicotine as cause of smoking-related illness.

### Introduction

Worldwide, comprehensive smoke-free legislation is the most widely adopted tobacco control measure.<sup>1</sup> The United Kingdom (UK) is a country with a high level of tobacco control<sup>2</sup> that includes smoke-free regulations. Smoking has been prohibited by law in enclosed and substantially enclosed work and public places since July 2007. The law also applies to workplace vehicles used by more than one person at any time and to private cars carrying children under 18 (in place in England, Wales and Scotland, under development in Northern Ireland).<sup>3–5</sup>

Policies banning tobacco smoking in public places or workplaces have been implemented because second-hand smoke exposure is harmful to health.<sup>6,7</sup> While the addictive constituent of tobacco smoke is nicotine, the health harms are caused by other constituents of cigarette smoke.<sup>8,9</sup> E-cigarettes can be used with a wide range of nicotine concentrations, including no nicotine, but in contrast with traditional cigarettes, e-cigarettes do not contain tobacco, do not create smoke and do not rely on combustion,<sup>10</sup> leading to much lower levels of harmful constituents in electronic cigarette vapour. There is little evidence that e-cigarette emissions harm the health of bystanders.<sup>10</sup> E-cigarette use may increase particulate matter in the air,<sup>11,12</sup> however, the composition is different from that caused by cigarette smoke<sup>13</sup> and concentrations are far lower<sup>14</sup> and sometimes

at the same levels as in rooms without smoking or e-cigarette use.<sup>15</sup> A small number of countries ban all use of e-cigarettes, and some ban use in all enclosed public places or specific places such as workplaces or public transportation,<sup>16</sup> partly because of fears use may renormalize smoking or undermine enforcement of smoke-free legislation.<sup>17</sup> In the UK, e-cigarette use in public places is not legislated, but many companies or institutions have drawn up individual policies.<sup>18,19</sup> Some guidance on workplace policies is available,<sup>20</sup> but there is no comprehensive information on current practice and policies.

Historically, public support for tobacco control legislation has been an important component in getting policies adopted in law and effectively implemented.<sup>21,22</sup> In the UK, smoke-free policies have been successfully implemented<sup>23,24</sup> and are supported by the majority of the public.<sup>4</sup>

Data on support for restricting the use of e-cigarettes in public places have been published from some surveys conducted between 2012 and 2014. They generally found less support among those who had used or tried e-cigarettes and ever-smokers (particularly current smokers), while increased perceptions of harm of e-cigarettes were associated with higher support for restrictions.<sup>25–32</sup> For smoking, introduction of legislation banning smoking in public places is often associated with a subsequent increase in smoke-free homes,<sup>33–35</sup> although a recent Canadian study did not find this effect.<sup>36</sup> Very little evidence is available on current practice around

e-cigarette use in homes. One small US survey found 45% of respondents always allowed e-cigarette use in their homes, 23% had some restrictions and 32% never allowed it.<sup>27</sup> Similar to support for banning use in smoke-free places, restrictions in the home were associated with risk perceptions. Benefits of banning e-cigarette use in the home will differ between homes in which smoking regularly occurs and smoke-free homes. In smoke-free homes, e-cigarette use could increase health harms, whereas in homes with regular smoking, allowing e-cigarette use instead of smoking could have benefits.

As there is much debate around regulations of e-cigarette use, it is important to obtain an overview of current practice, people's views and to understand the correlates of policy support. The present study therefore aimed to address three research questions:

- (1) What are current practices for use of e-cigarettes in people's homes and workplaces?
- (2) What characteristics are associated with allowing e-cigarette use in the home?
- (3) What is the level of support for extending smoke-free legislation to include e-cigarette use and what characteristics are associated with support?

## Methods

### *Design and procedure*

The present findings are based on secondary analyses of data from a cross-sectional online survey carried out in Great Britain between 2 and 23 March 2016. The survey is commissioned annually by the charity Action on Smoking and Health and includes questions relevant to tobacco and e-cigarette policy. The survey used a panel of around 816 000 UK adults (aged 18+) maintained by the market research company YouGov Plc. Panel members were emailed an invitation to participate without information on survey content. Members who agreed were allocated in line with required quotas for age and gender (interlocked), social grade, newspaper readership, ethnicity and region to achieve a good representation of the adult GB population. Members of the panel consent to completing surveys for YouGov in return for a modest financial incentive, and additional ethical approval was not sought due to this pre-existing consent. YouGov abides by British Polling Council and ESOMAR (World Association of Opinion and Marketing Research Professionals) guidelines, maintaining strict participant information confidentiality. All recodes and analyses for the present manuscript were run by the authors using data collected by YouGov.

### *Sample*

The survey was completed by 12 157 adults. Respondents who had never heard of e-cigarettes ( $n = 518$ , 4.3%) or selected 'don't know' ( $n = 150$ , 1.2%) for their e-cigarette use status were excluded because they would not be able to respond to the measures of interest. Additionally, 100 respondents (0.8%) who thought that regular cigarettes were not harmful were excluded, leaving  $n = 11 389$  for analyses (93.7%).

### *Measures*

#### **Socio-demographics**

Age (18–24; 25–34; 35–44; 45–54; 55 years and over) and gender (male and female) were recorded. Socio-economic status was recorded in two categories: ABC1 that includes managerial, professional and intermediate occupations and C2DE that includes small employers and own account workers, lower supervisory and technical occupations, semi-routine and routine occupations, never workers and long-term unemployed. Respondents who indicated that children under the age of 18 were living at home

with them were recorded as living with children. Political orientation was assessed using: 'If there were a general election held tomorrow, which party would you vote for? Conservative; Labour; UK Independence Party (UKIP); Liberal Democrat; Scottish National Party (SNP) (only for those living in Scotland); Plaid Cymru (only for those living in Wales); some other party; would not vote; don't know'. Responses were recoded into the three most common responses Conservatives (centre-right party), Labour (centre-left party), UK Independence Party (UKIP, right-wing party), 'Other party' and 'Would not vote/Don't know'. In general, Conservatives and Labour have supported tobacco control policies, while UKIP is opposed to policies such as plain packaging of tobacco and smoke-free policies in pubs; little information on party lines regarding e-cigarettes is available.

#### **Smoking and e-cigarette use**

Smoking status was measured using:

Smoking in this survey refers to all burnt tobacco products. It does NOT include e-cigarettes. Which of the following statements BEST applies to you? I have never smoked; I used to smoke but I have given up now; I smoke but I don't smoke every day; I smoke every day.

For logistic regressions, the last two options were combined as 'current smokers'. E-cigarette use status was measured using:

Which of the following statements BEST applies to you? I have never heard of e-cigarettes and have never tried them [excluded]; I have heard of e-cigarettes but have never tried them; I have tried e-cigarettes but do not use them (anymore); I have tried e-cigarettes and still use them; Don't know [excluded].

#### **Perceptions of nicotine and relative harm**

To assess knowledge around nicotine, respondents were asked

According to what you know or believe, what portion of the health risks of smoking comes from nicotine in cigarettes? None or very small; Some but well under half the risk; Around half the risk; Much more than half the risk; Nearly all the risk; Don't know.

Perceived harm of e-cigarettes relative to cigarettes was measured using:

Do you think electronic cigarettes (e-cigarettes) are more, less or as harmful as regular cigarettes? Electronic cigarettes are A LOT MORE harmful than regular cigarettes; Electronic cigarettes are MORE harmful than regular cigarettes; Electronic cigarettes are JUST AS harmful as regular cigarettes; Electronic cigarettes are LESS harmful than regular cigarettes; Electronic cigarettes are A LOT LESS harmful than regular cigarettes; Electronic cigarettes are completely harmless; Don't know; Not applicable – I do not think regular cigarettes are harmful [excluded].

For logistic regressions, responses were collapsed into more harmful/just as harmful, less harmful, don't know.

#### **Current practice and policy support**

Current practice around e-cigarette use in the home was assessed using: "If someone wanted to use an electronic cigarette in your home would you allow them to? Yes, I would; No, I would not; Don't know." All respondents were asked about smoking in the home: "Does anyone smoke in your home most days? Yes; No; Don't know." Respondents were asked about e-cigarette policies in their workplace: "Are people allowed to use electronic cigarettes in your workplace? Yes, anywhere with no restrictions; Yes, indoors but with restrictions; Yes, but only outdoors; No, they are not allowed anywhere; Don't know; Not applicable". Support for extending smoke-free legislations to e-cigarette use was assessed:

It is against the law to smoke in enclosed public places and workplaces, but because electronic cigarettes do not produce smoke they are not included in this legislation. How strongly, if at

**Table 1** Sample description, *N* = 11 389

|                                     | %    |                                         | %    |
|-------------------------------------|------|-----------------------------------------|------|
| Gender                              |      | E-cigarette use status                  |      |
| Female                              | 52.8 | Never tried                             | 84.3 |
| Male                                | 47.2 | Tried/used but not using                | 9.9  |
| Age                                 |      | Current user                            | 5.8  |
| 18–24                               | 9.3  | Perceived relative harm of e-cigarettes |      |
| 25–34                               | 8.5  | A lot more harmful [than cigarettes]    | 1.2  |
| 35–44                               | 14.1 | More harmful                            | 1.4  |
| 45–54                               | 18.8 | Just as harmful                         | 22.4 |
| 55+                                 | 49.2 | Less harmful                            | 30.1 |
| Social grade                        |      | A lot less harmful                      | 14.9 |
| ABC1                                | 62.1 | E-cigarettes are completely harmless    | 1.2  |
| C2DE                                | 37.9 | Don't know                              | 28.8 |
| Living with children under 18 years |      | Risks of smoking from nicotine          |      |
| Yes                                 | 18.4 | None or very small                      | 7.9  |
| No                                  | 81.6 | Some but well under half                | 19.9 |
| Political orientation               |      | Around half                             | 17.6 |
| Labour                              | 28.7 | Much more than half                     | 19.2 |
| Conservative                        | 25.7 | Nearly all                              | 15.1 |
| UKIP                                | 13.6 | Don't know                              | 20.3 |
| Other party                         | 12.7 | Someone smokes in home most days        |      |
| Would not vote/don't know           | 19.3 | Yes                                     | 12.4 |
| Smoking status                      |      | No                                      | 87.3 |
| Never smoker                        | 49.2 | Don't know                              | 0.3  |
| Ex-smoker                           | 36.6 |                                         |      |
| Non-daily smoker                    | 3.5  |                                         |      |
| Daily smoker                        | 10.8 |                                         |      |

all, do you support or oppose extending this law to cover the use of electronic cigarettes?

Responses were given on a five-point scale from 'strongly support' to 'strongly oppose' or an additional 'don't know' option. For logistic regressions, this was collapsed into support ("strongly support" and "tend to support") vs. all other responses.

## Analysis

Percentages were used to describe socio-demographics, smoking status, e-cigarette use status, perceptions of nicotine and relative harm, current practices in workplaces (overall and by socio-economic status) and homes and support for extending smoke-free laws.

Logistic regressions were used to assess the association between allowing e-cigarette use in the home and socio-demographics, smoking status, e-cigarette use status, perceptions of nicotine and relative harm and living with children. Assessment of bivariate associations was followed by multivariable models including all variables. Similarly, logistic regressions assessed associations between support for extending smoke-free laws and socio-demographics, smoking status, e-cigarette use status, perceptions of nicotine and relative harm and living with children. Multicollinearity was checked using the same variables in multiple linear regressions. When including smoking in the home in multivariable logistic regressions for allowing e-cigarette use in the home, multicollinearity was indicated and therefore only the bivariate association is reported.

## Results

### Descriptives

Table 1 shows information about the respondents. Compared with national statistics from 2015,<sup>37</sup> the present sample was older; specifically, a smaller proportion of the present sample was aged 25–34 (8.5 vs. 17.2%) and a larger proportion was aged 55 or over (49.2 vs. 37.2%). Higher social grades were somewhat overrepresented compared with 2011 figures for Great Britain where 53% were in grades ABC1.<sup>38</sup> This may to some extent explain the comparatively

low smoking prevalence; another representative survey found it to be around 18% in 2016.<sup>39</sup>

### Current practice in homes and workplaces

Workplace policies were not applicable to *n* = 4591 (40.3%) respondents, presumably often because they did not work outside the home. Of those to whom it was applicable, 4.1% reported no restrictions on e-cigarette use, 4.3% reported use was allowed indoors with restrictions, 27.6% reported use was allowed outdoors, 47.3% reported use was not allowed anywhere and 16.8% did not know their workplace policy. Respondents with a higher socio-economic status were more likely to report restrictions ( $\chi^2 = 90.26$ ,  $P < 0.001$ ; figure 1a).

A small majority (57.5%) would not allow e-cigarette use in their home (figure 1b). In adjusted analysis, all characteristics were associated with allowing use. Allowing use was far less likely among those who had never used e-cigarettes, or perceived e-cigarettes as at least as harmful as cigarettes (table 2). Men, older respondents, those of a higher socio-economic status, those voting Conservative, other party or undecided/non-voters, ex-smokers and never smokers, those who had tried but were not using e-cigarettes and those who perceived nicotine to be causing more than a little of the health harms of smoking were all less likely to allow e-cigarette use in their home. No multicollinearity was indicated if smoking in the home was not included (VIF from 1.02 to 1.36, tolerance 0.74 to 0.98).

### Policy support

Just over half (52.2%) supported an extension of smoke-free laws to include the use of e-cigarettes and a fifth (20.7%) were opposed to an extension (figure 1c).

Several characteristics were associated with support for extending smoke-free laws in adjusted analysis (table 3). Men, younger adults, those from higher social grades were more likely to support an extension. Those who would vote Labour were more likely to support an extension than UKIP voters and those who would not vote or were undecided. Never-smokers and ex-smokers were more likely to support an extension than current smokers. Those who had

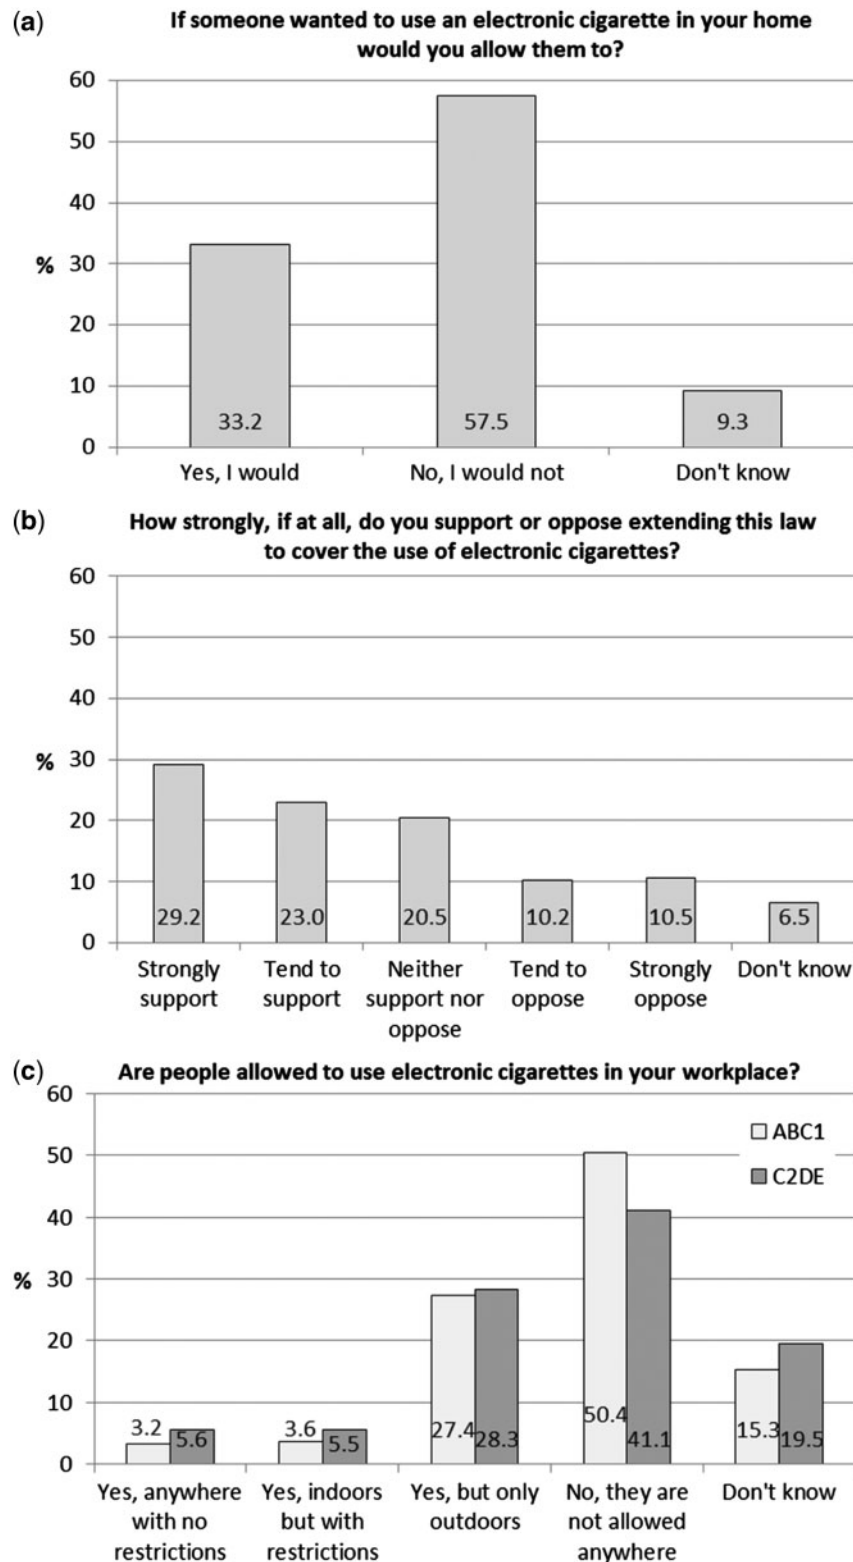

**Figure 1** (a) E-cigarette use in the workplace by socio-economic status,  $n = 6798$  (excluding 'not applicable'); (b) Allowing e-cigarette use in the home by socio-economic status,  $N = 11\,389$ ; (c) Support for extending smoke-free laws,  $N = 11\,389$ . Full text of question: "It is against the law to smoke in enclosed public places and workplaces, but because electronic cigarettes do not produce smoke they are not included in this legislation. How strongly, if at all, do you support or oppose extending this law to cover the use of electronic cigarettes?"

never tried e-cigarettes were more likely to support an extension than current e-cigarette users. Compared with those who knew that only a small part of the health risks of smoking is due to nicotine, all other responses to this question were associated with increased likelihood of supporting an extension and odds increased

with the level of risk ascribed to nicotine. In line with this, those who perceived e-cigarettes to be at least as harmful as cigarettes were more supportive of an extension of the law (table 3). No multicollinearity was indicated (VIF from 1.02 to 1.36, tolerance 0.74 to 0.98).

**Table 2** Associations with allowing e-cigarette use in the home, logistic regressions, *N* = 11 389

|                                         | Would allow use in home, % | Unadjusted/Bivariate |                         | Adjusted/Multivariable |                         |
|-----------------------------------------|----------------------------|----------------------|-------------------------|------------------------|-------------------------|
|                                         |                            | OR                   | 95% Confidence interval | OR                     | 95% Confidence interval |
| <b>Gender</b>                           |                            |                      |                         |                        |                         |
| Male (referent)                         | 32.4                       | 1                    |                         | 1                      |                         |
| Female                                  | 33.9                       | 1.07                 | 0.99–1.16               | 1.33                   | 1.21–1.47               |
| <b>Age</b>                              |                            |                      |                         |                        |                         |
| 18–24 (referent)                        | 42.5                       | 1                    |                         | 1                      |                         |
| 25–34                                   | 37.1                       | 0.80                 | 0.67–0.96               | 0.91                   | 0.73–1.13               |
| 35–44                                   | 34.1                       | 0.70                 | 0.60–0.82               | 0.91                   | 0.74–1.12               |
| 45–54                                   | 33.8                       | 0.70                 | 0.60–0.81               | 0.87                   | 0.72–1.05               |
| 55 and over                             | 30.3                       | 0.59                 | 0.51–0.67               | 0.73                   | 0.61–0.87               |
| <b>Social grade</b>                     |                            |                      |                         |                        |                         |
| C2DE (referent)                         | 37.7                       | 1                    |                         | 1                      |                         |
| ABC1                                    | 30.4                       | 0.72                 | 0.67–0.78               | 0.80                   | 0.73–0.89               |
| <b>Living with children</b>             |                            |                      |                         |                        |                         |
| No                                      | 34.1                       | 1                    |                         | 1                      |                         |
| Yes                                     | 29.2                       | 0.78                 | 0.72–0.88               | 0.66                   | 0.58–0.76               |
| <b>Political orientation</b>            |                            |                      |                         |                        |                         |
| Labour (referent)                       | 38.6                       | 1                    |                         | 1                      |                         |
| Conservative                            | 27.4                       | 0.60                 | 0.54–0.67               | 0.71                   | 0.63–0.81               |
| UKIP                                    | 36.4                       | 0.91                 | 0.81–1.03               | 0.93                   | 0.80–1.09               |
| Other                                   | 33.7                       | 0.81                 | 0.71–0.92               | 0.81                   | 0.69–0.95               |
| Would not vote/don't know               | 30.4                       | 0.70                 | 0.62–0.78               | 0.73                   | 0.64–0.84               |
| <b>Smoking status</b>                   |                            |                      |                         |                        |                         |
| Current smoker (referent)               | 76.9                       | 1                    |                         | 1                      |                         |
| Ex-smoker                               | 33.9                       | 0.15                 | 0.14–0.18               | 0.26                   | 0.22–0.30               |
| Never smoker                            | 20.0                       | 0.08                 | 0.07–0.09               | 0.16                   | 0.14–0.19               |
| <b>E-cigarette use status</b>           |                            |                      |                         |                        |                         |
| Current user (referent)                 | 91.5                       | 1                    |                         | 1                      |                         |
| Tried/used but not using                | 78.2                       | 0.33                 | 0.25–0.45               | 0.38                   | 0.27–0.52               |
| Never tried                             | 23.9                       | 0.03                 | 0.02–0.04               | 0.09                   | 0.07–0.12               |
| <b>Risks of smoking from nicotine</b>   |                            |                      |                         |                        |                         |
| None/very small (referent)              | 62.6                       | 1                    |                         | 1                      |                         |
| Some/around half                        | 38.6                       | 0.38                 | 0.32–0.44               | 0.58                   | 0.49–0.69               |
| Much more than half/nearly all          | 23.4                       | 0.18                 | 0.16–0.21               | 0.44                   | 0.36–0.53               |
| Don't know                              | 28.4                       | 0.24                 | 0.20–0.28               | 0.46                   | 0.38–0.56               |
| <b>Perceived relative harm</b>          |                            |                      |                         |                        |                         |
| Less harmful (referent)                 | 47.3                       | 1                    |                         | 1                      |                         |
| More harmful/just as harmful            | 15.5                       | 0.21                 | 0.18–0.23               | 0.22                   | 0.19–0.25               |
| Don't know                              | 26.0                       | 0.39                 | 0.36–0.43               | 0.47                   | 0.42–0.53               |
| <b>Someone smokes in home most days</b> |                            |                      |                         |                        |                         |
| Yes                                     | 82.0                       | 1                    |                         | 1                      |                         |
| No/don't know                           | 26.3                       | 0.08                 | 0.07–0.09               |                        |                         |

## Discussion

This survey in Great Britain indicates that over half of adults would not allow use of e-cigarettes in their home. Allowing e-cigarette use in the home was associated with decreased perceptions of harm, smoking and knowing that nicotine is not the main cause of health risks of smoking, but the strongest associations were with having tried an e-cigarette and living in a home where someone smoked most days. Notably, even among those living in homes with someone smoking most days, almost a fifth would not allow e-cigarette use. The survey findings also indicate that restrictions on e-cigarette use in workplaces are common. A considerable proportion did not know the regulations regarding e-cigarettes at their workplace; this may be because workplaces may not have a policy or because respondents never had reason to find out. About half of those describing workplace policies reported that e-cigarette use was not allowed anywhere. This may be inflated because offices may not have outdoor spaces perceived to be part of the workplace. Just over half of adults were supportive of extending current smoke-free laws to include vaping. Never smokers and ex-smokers, representing the majority of the British adult population, were more likely to support a ban on the use of e-cigarettes in smoke-free places than current smokers. Knowledge about

nicotine and more realistic perceptions of harm of e-cigarettes relative to tobacco cigarettes were associated with less support for extending restrictions. However, even among those with the lowest harm perceptions and accurate nicotine knowledge, considerable proportions were supportive, indicating other factors also drive support for this policy.

The survey could not assess all factors that may influence policy support or rules on e-cigarette use in the home. Other limitations include that the wording of the question assessing policy support was complex and had a low reading ease (high reading age: Flesch-Kincaid grade level 12.9, SMOG index 15.4.<sup>40</sup> However, the question is very close in its wording to a long-standing question assessing support for smoke-free legislation which has been used to assess changes over time. Although the recruitment aimed to ensure representativeness of the British adult population, the present sample differed from the general population in some characteristics. Over-represented groups were more likely not to allow e-cigarette use in the home and more likely to support an extension of smoke-free laws, suggesting that the GB population as a whole may be slightly more liberal in their views on e-cigarettes than the present sample.

The questions on perceived harm of e-cigarettes did not differentiate between harm to the user or bystander or between e-cigarettes containing nicotine and those not containing nicotine. Perception of

**Table 3** Associations with support for extending smoke-free laws to include e-cigarettes, logistic regressions, *N* = 11 389

|                                | Support extending laws, % | Unadjusted/Bivariate |                         | Adjusted/Multivariable |                         |
|--------------------------------|---------------------------|----------------------|-------------------------|------------------------|-------------------------|
|                                |                           | OR                   | 95% Confidence interval | OR                     | 95% Confidence interval |
| Gender                         |                           |                      |                         |                        |                         |
| Male (referent)                | 52.7                      | 1                    |                         | 1                      |                         |
| Female                         | 51.9                      | 0.97                 | 0.90–1.04               | 0.82                   | 0.76–0.89               |
| Age                            |                           |                      |                         |                        |                         |
| 18–24 (referent)               | 53.2                      | 1                    |                         | 1                      |                         |
| 25–34                          | 53.0                      | 0.99                 | 0.84–1.18               | 0.90                   | 0.74–1.10               |
| 35–44                          | 52.1                      | 0.96                 | 0.82–1.12               | 0.80                   | 0.67–0.96               |
| 45–54                          | 51.7                      | 0.94                 | 0.81–1.09               | 0.81                   | 0.68–0.96               |
| 55 and over                    | 52.2                      | 0.96                 | 0.84–1.10               | 0.79                   | 0.68–0.93               |
| Social grade                   |                           |                      |                         |                        |                         |
| C2DE (referent)                | 48.0                      | 1                    |                         | 1                      |                         |
| ABC1                           | 54.9                      | 1.32                 | 1.22–1.42               | 1.25                   | 1.15–1.37               |
| Living with children           |                           |                      |                         |                        |                         |
| No                             | 51.7                      | 1                    |                         | 1                      |                         |
| Yes                            | 54.6                      | 1.12                 | 1.02–1.23               | 1.15                   | 1.02–1.29               |
| Political orientation          |                           |                      |                         |                        |                         |
| Labour (referent)              | 52.2                      | 1                    |                         | 1                      |                         |
| Conservative                   | 56.9                      | 1.21                 | 1.09–1.34               | 1.06                   | 0.95–1.18               |
| UKIP                           | 45.7                      | 0.77                 | 0.68–0.87               | 0.73                   | 0.64–0.84               |
| Other                          | 56.1                      | 1.17                 | 1.03–1.32               | 1.10                   | 0.96–1.26               |
| Would not vote/don't know      | 48.3                      | 0.86                 | 0.77–0.95               | 0.82                   | 0.73–0.92               |
| Smoking status                 |                           |                      |                         |                        |                         |
| Current smoker (referent)      | 26.0                      | 1                    |                         | 1                      |                         |
| Ex-smoker                      | 51.1                      | 2.97                 | 2.62–3.37               | 2.11                   | 1.82–2.44               |
| Never smoker                   | 60.8                      | 4.41                 | 3.90–4.99               | 2.67                   | 2.30–3.11               |
| E-cigarette use status         |                           |                      |                         |                        |                         |
| Current user (referent)        | 20.1                      | 1                    |                         | 1                      |                         |
| Tried/used but not using       | 27.7                      | 1.53                 | 1.21–1.93               | 1.26                   | 0.99–1.61               |
| Never tried                    | 57.4                      | 5.36                 | 4.41–6.52               | 2.50                   | 2.02–3.09               |
| Risks of smoking from nicotine |                           |                      |                         |                        |                         |
| None/very small (referent)     | 32.6                      | 1                    |                         | 1                      |                         |
| Some/around half               | 52.1                      | 2.25                 | 1.93–2.62               | 1.67                   | 1.42–1.97               |
| Much more than half/nearly all | 61.1                      | 3.24                 | 2.78–3.78               | 2.06                   | 1.73–2.44               |
| Don't know                     | 45.2                      | 1.70                 | 1.45–2.00               | 1.28                   | 1.07–1.54               |
| Perceived relative harm        |                           |                      |                         |                        |                         |
| Less harmful (referent)        | 44.7                      | 1                    |                         | 1                      |                         |
| More harmful/just as harmful   | 75.6                      | 3.84                 | 3.47–4.25               | 3.53                   | 3.17–3.93               |
| Don't know                     | 44.1                      | 0.98                 | 0.89–1.07               | 0.92                   | 0.83–1.01               |

harm may differ with these characteristics and more detailed measurement of harm perception could be of interest.

The existing smoke-free legislation enjoys wider support than a possible extension to include e-cigarettes. In 2014, the most recent available data, 82% of the population supported the existing smoke-free legislation<sup>4</sup> with 8% opposing it, compared with 51% supporting restricting e-cigarette use in the same way and 21% opposing it. Support for smoke-free legislation has increased over time; however, over two-thirds of the population were in favour before the legislation was implemented.<sup>4</sup>

The present survey extends previous evidence on support for e-cigarette policies by including political affiliation and never-smokers in a large sample of the population in a country with a strong tobacco control profile. As might be expected, with the inclusion of never-smokers, overall support for restricting e-cigarette use in smoke-free places was slightly higher than in a recent survey of ex-smokers and smokers.<sup>32</sup> As expected, affiliation with a party opposed to tobacco control policies was associated with reduced support for e-cigarette regulation. Across countries and using different measures, surveys consistently find less support for restricting e-cigarette use among those who have experience with e-cigarettes or accurately perceive them to be less harmful than smoking.<sup>27,29</sup>

Future research should assess support over time and in countries with different e-cigarette and smoke-free legislation, in addition to tracking changes in perceived relative harm and use of e-cigarettes by smokers to monitor potential unintended consequences. This

should include tracking before and after changes in legislation regulating the use of e-cigarettes in public places.

## Conclusion

In Great Britain, the majority of workplaces has policies restricting the use of e-cigarettes. Half of adults would not allow use of e-cigarettes in their home and support prohibiting the use of e-cigarettes in smoke-free places. More restrictive attitudes are more common among never-smokers, never-users of e-cigarettes and those with increased perception of relative harms of e-cigarettes compared with cigarettes or nicotine as cause of smoking-related illness.

## Acknowledgements

This study uses data which YouGov collected and shared with the authors who conducted all analyses reported here.

## Funding

This study was supported by a number of sources. L.B. is funded by a Cancer Research UK (CRUK)/BUPA Foundation Cancer Prevention Fellowship (C52999/A19748). This work was part funded by a separate grant (C25586/A19540). L.B. and A.Mc.N. are members of the UK Centre for Tobacco and Alcohol Studies, a

UK Clinical Research Collaboration Public Health Research: Centre of Excellence. Funding from the Medical Research Council, British Heart Foundation, Cancer Research UK, Economic and Social Research Council and the National Institute for Health Research under the auspices of the UK Clinical Research Collaboration is gratefully acknowledged 35 (MR/K023195/1). DA and HC are employed by Action on Smoking & Health which receives funding from CRUK, British Heart Foundation and the Department of Health.

*Conflicts of interest:* None declared.

## Key points

- This study for the first time provides information on practices and policies on e-cigarette use in workplaces and homes in Great Britain
- The majority of workplaces appear to have policies restricting e-cigarette use.
- Over half of adults would not allow use of e-cigarettes in their home and support prohibiting the use of e-cigarettes in smoke-free places, which is lower than support for smoke-free regulations.
- Support is higher among adults who erroneously perceive nicotine as important cause of smoking-related illness or e-cigarettes as at least as harmful as combustible tobacco cigarettes

## References

- World Health Organization. *WHO report on the global tobacco epidemic, 2013: enforcing bans on tobacco advertising, promotion and sponsorship*. Geneva: World Health Organization, 2013.
- Joossens L, Raw M. *The Tobacco Control Scale 2013 in Europe*. Brussels: Association of European Cancer Leagues, 2014.
- Her Majesty's Government. *The Health Act 2006*. London: Crown Copyright, 2006.
- Action on Smoking and Health (ASH). ASH fact sheet: smokefree legislation. [http://ash.org.uk/files/documents/ASH\\_119.pdf](http://ash.org.uk/files/documents/ASH_119.pdf). 2015 (8 June 2016, date last accessed).
- Royal College of Physicians. *Passive smoking and children*. London: RCP, 2010.
- Callinan JE, Clarke A, Doherty K, Kelleher C. Legislative smoking bans for reducing secondhand smoke exposure, smoking prevalence and tobacco consumption. *Cochrane Database Syst Rev* (Online). 2010; Issue 4 CD005992. PubMed PMID: 20393945.
- Tan CE, Glantz SA. Association between smoke-free legislation and hospitalizations for cardiac, cerebrovascular, and respiratory diseases: a meta-analysis. *Circulation* 2012; 126:2177–83. PubMed PMID: 23109514. Pubmed Central PMCID: 3501404.
- Drug & Therapeutics Bulletin. Republished: Nicotine and health. *BMJ* 2014;349:8. 2014 7 0264rep. PubMed PMID: 25428425.
- National Institute for Health and Care Excellence. *PH45 Tobacco: Harm-reduction approaches to smoking*. London: NICE, 2013.
- McNeill A, Brose LS, Calder R, Hitchman SC, et al. *E-cigarettes: an evidence update. A report commissioned by Public Health England*. Public Health England, editor. London: Crown Copyright, 2015.
- Schober W, Szendrei K, Matzen W, et al. Use of electronic cigarettes (e-cigarettes) impairs indoor air quality and increases FeNO levels of e-cigarette consumers. *Int J Hygiene Environ Health* 2014;217:628–37. PubMed PMID: 24373737.
- Soule EK, Maloney SF, Spindle TR, et al. Electronic cigarette use and indoor air quality in a natural setting. *Tobacco Control* 2017;26:109–112. PubMed PMID: 26880745.
- McNeill A, Etter JF, Farsalinos K, et al. A critique of a WHO-commissioned report and associated article on electronic cigarettes. *Addiction (Abingdon, England)* 2014;109:2128–34. PubMed PMID: 25196419.
- Ruprecht AA, De Marco C, Pozzi P, Munarini E, et al. Comparison between particulate matter and ultrafine particle emission by electronic and normal cigarettes in real-life conditions. *Tumori* 2014;100:e24–7. PubMed PMID: 24675506.
- Fernandez E, Ballbe M, Sureda X, et al. Particulate matter from electronic cigarettes and conventional cigarettes: a systematic review and observational study. *Curr Environ Health Rep* 2015;2:423–9. PubMed PMID: 26452675.
- Institute for Global Tobacco Control. Country laws regulating e-cigarettes: a policy scan, 2015. Available at: <http://globaltobaccocontrol.org/e-cigarette/country-laws-regulating-e-cigarettes>. (19 November 2015, date last accessed).
- World Health Organization. Electronic nicotine delivery systems. Report by WHO, 2014. Available at: [www.who.int/entity/tobacco/communications/statements/electronic\\_cigarettes/en/](http://www.who.int/entity/tobacco/communications/statements/electronic_cigarettes/en/) (6 Jul 2016, date last accessed).
- Mayor of London. Transport for London Conditions of Carriage, 2016. Available at: <http://content.tfl.gov.uk/tfl-conditions-of-carriage.pdf>. 2016 (3 Feb 2016, date last accessed).
- Meernik C, Baker HM, Paci K, Fischer-Brown I, et al. Electronic Cigarettes on Hospital Campuses. *Int J Environ Res Public Health* 2016;13:87. PubMed PMID: 26729142.
- Public Health England. *Use of e-cigarettes in public places and workplaces – Advice to inform evidence-based policy making*. London: Crown Copyright, 2016.
- International Agency for Research on Cancer. *Tobacco Control, Evaluating the effectiveness of smoke-free policies*. Lyon, France: World Health Organization, 2009.
- Arnott D, Dockrell M, Sandford A, Willmore I. Comprehensive smoke-free legislation in England: how advocacy won the day. *Tobacco Control* 2007;16:423–8. PubMed PMID: 18048621. Pubmed Central PMCID: 2807200.
- Smokefree England. Smokefree legislation compliance data, 2009. Available at: <http://www.smokefreeengland.co.uk/thefacts/national-compliance-data/>. (28 Jul 2016, date last accessed).
- King BA, Hyland AJ, Borland R, et al. Socioeconomic variation in the prevalence, introduction, retention, and removal of smoke-free policies among smokers: findings from the International Tobacco Control (ITC) Four Country Survey. *Int J Environ Res Public Health* 2011;8:411–34. PubMed PMID: 21556194. Pubmed Central PMCID: 3084469.
- Tan AS, Lee CJ, Bigman CA. Public support for selected e-cigarette regulations and associations with overall information exposure and contradictory information exposure about e-cigarettes: findings from a national survey of U.S. adults. *Prevent Med* 2015;81:268–74. PubMed PMID: 26400638.
- Wackowski OA, Delnevo CD. Smokers' attitudes and support for e-cigarette policies and regulation in the USA. *Tobacco Control* 2015;24:543–6. PubMed PMID: 25564281. Pubmed Central PMCID: 4540684.
- Kolar SK, Rogers BG, Hooper MW. Support for indoor bans on electronic cigarettes among current and former smokers. *Int J Environ Res Public Health* 2014;11: 12174–89. PubMed PMID: 25429684. Pubmed Central PMCID: 4276608.
- Majeed BA, Dube SR, Sterling K, et al. Opinions about electronic cigarette use in smoke-free areas among U.S. Adults, 2012. *Nicotine Tob Res* 2015;17:675–81. PubMed PMID: 25358659.
- Mello S, Bigman CA, Sanders-Jackson A, Tan AS. Perceived harm of secondhand electronic cigarette vapors and policy support to restrict public vaping: results from a National Survey of US Adults. *Nicotine Tob Res* 2016;18:686–693. PubMed PMID: 26470722.
- Tan AS, Bigman CA, Sanders-Jackson A. Sociodemographic correlates of self-reported exposure to e-cigarette communications and its association with public support for smoke-free and vape-free policies: results from a national survey of US adults. *Tobacco Control* 2015;24:574–81. PubMed PMID: 25015372. Pubmed Central PMCID: 4289647.
- Martinez-Sanchez JM, Ballbe M, Fu M, Martin-Sanchez JC, et al. Attitudes towards electronic cigarettes regulation in indoor workplaces and selected public and private places: a population-based cross-sectional study. *PLoS one* 2014;9:e114256. PubMed PMID: 25469996. Pubmed Central PMCID: 4254991.
- Brose LS, Partos TR, Hitchman SC, McNeill A. Support for e-cigarette policies: a survey of smokers and ex-smokers in Great Britain. *Tobacco Control* 2016; PubMed PMID: 27312824. doi: 10.1136/tobaccocontrol-2016-052987.
- Mons U, Nagelhout GE, Allwright S, et al. Impact of national smoke-free legislation on home smoking bans: findings from the International Tobacco Control Policy

- Evaluation Project Europe Surveys. *Tobacco Control* 2013;22:e2–9. PubMed PMID: 22331456. Pubmed Central PMCID: 4010876.
- 34 Borland R, Yong HH, Cummings KM, et al. Determinants and consequences of smoke-free homes: findings from the International Tobacco Control (ITC) Four Country Survey. *Tobacco Control* 2006;iii:42–50. PubMed PMID: 16754946. Pubmed Central PMCID: 2593064.
- 35 Jarvis MJ, Sims M, Gilmore A, Mindell J. Impact of smoke-free legislation on children's exposure to secondhand smoke: cotinine data from the Health Survey for England. *Tobacco Control* 2012;21:18–23. PubMed PMID: 21527405.
- 36 Kairouz S, Lasnier B, Mihaylova T, et al. Smoking restrictions in homes after implementation of a smoking ban in public places. *Nicotine Tob Res* 2015;17:41–7. PubMed PMID: 25140045. Pubmed Central PMCID: 4832964.
- 37 Office for National Statistics. *Population estimates for the UK, mid-2015*. London: Office for National Statistics, 2016.
- 38 Office for National Statistics. 2011 Census: Approximated social grade, local authorities in England and Wales, 2013. Available at: <http://www.ons.gov.uk/peoplepopulationandcommunity/populationandmigration/populationestimates/datasets/2011censusstatisticsandquickstatisticsforlocalauthoritiesintheunitingkingdompart3>. (6 July 2016, date last accessed).
- 39 West R, Brown J. Smoking in England – latest statistics Smoking Toolkit Study, 2016. Available at: <http://www.smokinginengland.info/latest-statistics/>. (8 June 2016, date last accessed).
- 40 Hedman AS. Using the SMOG formula to revise a health-related document. *Am J Health Educ* 2008;39:61–4.

.....  
*The European Journal of Public Health*, Vol. 27, No. 4, 736–741

© The Author 2017. Published by Oxford University Press on behalf of the European Public Health Association. All rights reserved.  
 doi:10.1093/eurpub/ckx035 Advance Access published on 3 April 2017

.....

## Burden of smoking in Lithuania: attributable mortality and years of potential life lost

Vaida Liutkutė<sup>1</sup>, Aurelijus Veryga<sup>2</sup>, Mindaugas Štelemėkas<sup>1</sup>, Nijolė Goštautaitė Midttun<sup>3</sup>

1 Health Research Institute, Faculty of Public Health, Lithuanian University of Health Sciences, Kaunas, Lithuania

2 Ministry of Health of The Republic of Lithuania, Vilnius, Lithuania

3 Mental Health Initiative, Vilnius, Lithuania

**Correspondence:** Vaida Liutkutė, Health Research Institute, Faculty of Public Health, Lithuanian University of Health Sciences, Tilžės g. 18, LT-47181 Kaunas, Lithuania. Tel: +370 608 90 763, e-mail: vaida.liutkute@ismuni.lt

**Background:** High mortality rates from smoking related diseases are a significant public health issue in Lithuania. Study aims to estimate the number of smoking attributable deaths (SADs) and years of potential life lost in Lithuania in 2013.

**Methods:** Gender, age and disease specific mortality was calculated by applying the smoking attributable fractions (SAFs) to prevalence estimates of current and former smokers among Lithuanian adults aged  $\geq 35$  years that are based on the 2005 Lithuanian Health Interview Survey. Mortality data were obtained from the Institute of Hygiene Health Information Centre. Eight years lag was assumed between smoking rates and subsequent mortality. Sensitivity analysis was used to calculate SAFs applying smoking impact ratio method.

**Results:** In 2013, 13.9% of total mortality or 5771 deaths in Lithuania were attributable to smoking (5181 men and 590 women). The two leading causes of SADs were ischaemic heart disease (2861) and lung cancer (1054) that accounted for 67.8% of the smoking attributable mortality. In the same year, smoking accounted for 39 279 years of potential life lost (34 663 years for men and 4615 years for women).

**Conclusions:** Smoking causes a considerable mortality burden in Lithuania, killing nine times more males than females. Therefore reduction of smoking prevalence is an urgent public health need, which calls for implementation of effective and comprehensive tobacco control measures consistent with the World Health Organization Framework Convention on Tobacco Control Articles and Protocols and The Tobacco Products Directive.

.....

## Introduction

Smoking worldwide is identified as the second leading risk factor for death from any cause, resulting in almost 6 million deaths each year.<sup>1</sup> It is predicted that tobacco related mortality could rise to more than 8.3 million deaths by 2030, although it could decline by 9% in high-income countries.<sup>2</sup> Since 1980, the estimated global prevalence of daily smokers has decreased, but because of the population growth, the number of smokers has increased significantly.<sup>3</sup> Therefore tobacco use continues to significantly influence global health patterns.

Strong evidence from vast number of studies worldwide show that tobacco smoking increases the risk of cancer, vascular and respiratory diseases, also has serious effects on reproductive health.<sup>4</sup> To be

precise, tobacco use is globally responsible for 10% of all deaths from cardiovascular diseases, and 22% of all cancer deaths.<sup>5</sup>

According to the Statistics Lithuania, 34% of men and 9% of women aged 15 and older identified themselves as daily smokers in 2014.<sup>6</sup> compared with 42 and 10%, respectively in 2005.<sup>7</sup> High mortality rates due to specifically smoking-related diseases in Lithuania<sup>8</sup> is a significant public health issue that requires adequate interventions.

One of the most important measures for ascertaining the impact of tobacco on health is the estimation of the mortality attributable to its use.<sup>9,10</sup> Methodologies for calculating smoking attributable mortality (SAM) vary according to availability of data, but mainly there are three methods of estimating mortality attributable to tobacco use—prevalence based analysis in cohort studies,
